# Supplementary material for: Synthesis of silicophosphates containing SiO6-octahedra under ambient conditions – reactions of anhydrous H3PO4 with alkoxysilanes
Source: Royal Society of Chemistry journal article supplement (doi:10.1039/c2cc31600e), 2012-01-01
Supplement: c2cc31600e.pdf [file c2cc31600e.pdf]

Electronic Supplementary Information for

# Synthesis of silicophosphates containing $\text{SiO}_6$ -octahedra under ambient conditions - reactions of anhydrous $\text{H}_3\text{PO}_4$ with alkoxy silanes

Sandra Jähnigen,<sup>a</sup> Erica Brendler,<sup>b</sup> Uwe Böhme,<sup>a</sup> and Edwin Kroke,<sup>\*a</sup>

<sup>a</sup> TU Bergakademie Freiberg, Institut für Anorganische Chemie, Leipziger Straße 29, 09596 Freiberg, Germany. Fax: +49 (0)3731 394058; Tel: +49 (0)3731 393174; E-mail: Edwin.Kroke@chemie.tu-freiberg.de

<sup>b</sup> TU Bergakademie Freiberg, Institut für Analytische Chemie, Leipziger Straße 29, 09596 Freiberg, Germany.

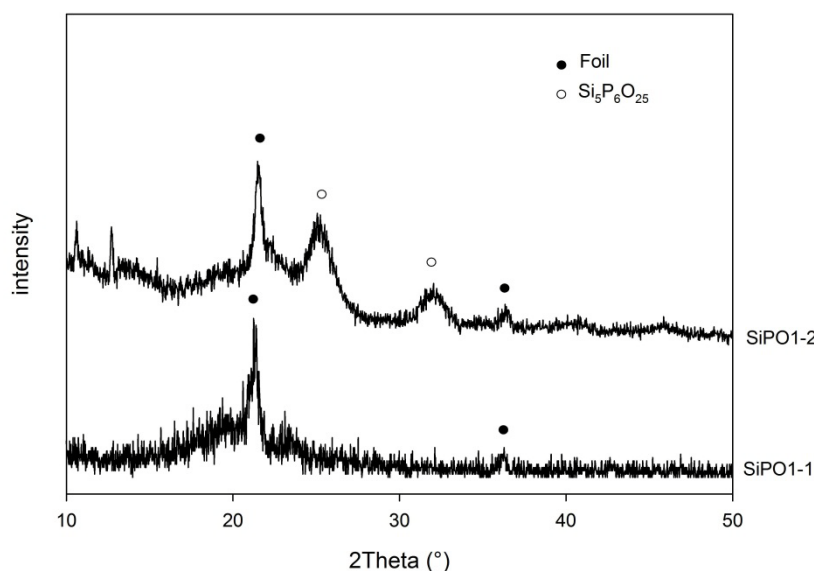

**Fig. S1** XRD diffraction data of **SiPO1-1** and **SiPO1-2**.

X-Ray diffraction patterns were measured with a D5000 (Siemens) diffractometer using  $\text{Cu-K}\alpha$  radiation ( $\lambda = 1.5406 \text{ nm}$ ) and a D8 Discover (Bruker) diffractometer using  $\text{Cu-K}\alpha$  radiation ( $\lambda = 1.5418 \text{ nm}$ ). Because of a possible instability when exposed to air the samples were protected with foil.
